# Supplementary material
Source: PubMed Central journal article supplement (PMC2967489)
Supplement: NIHMS232420-supplement-1.pdf [file NIHMS232420-supplement-1.pdf]

## Supplementary Figures

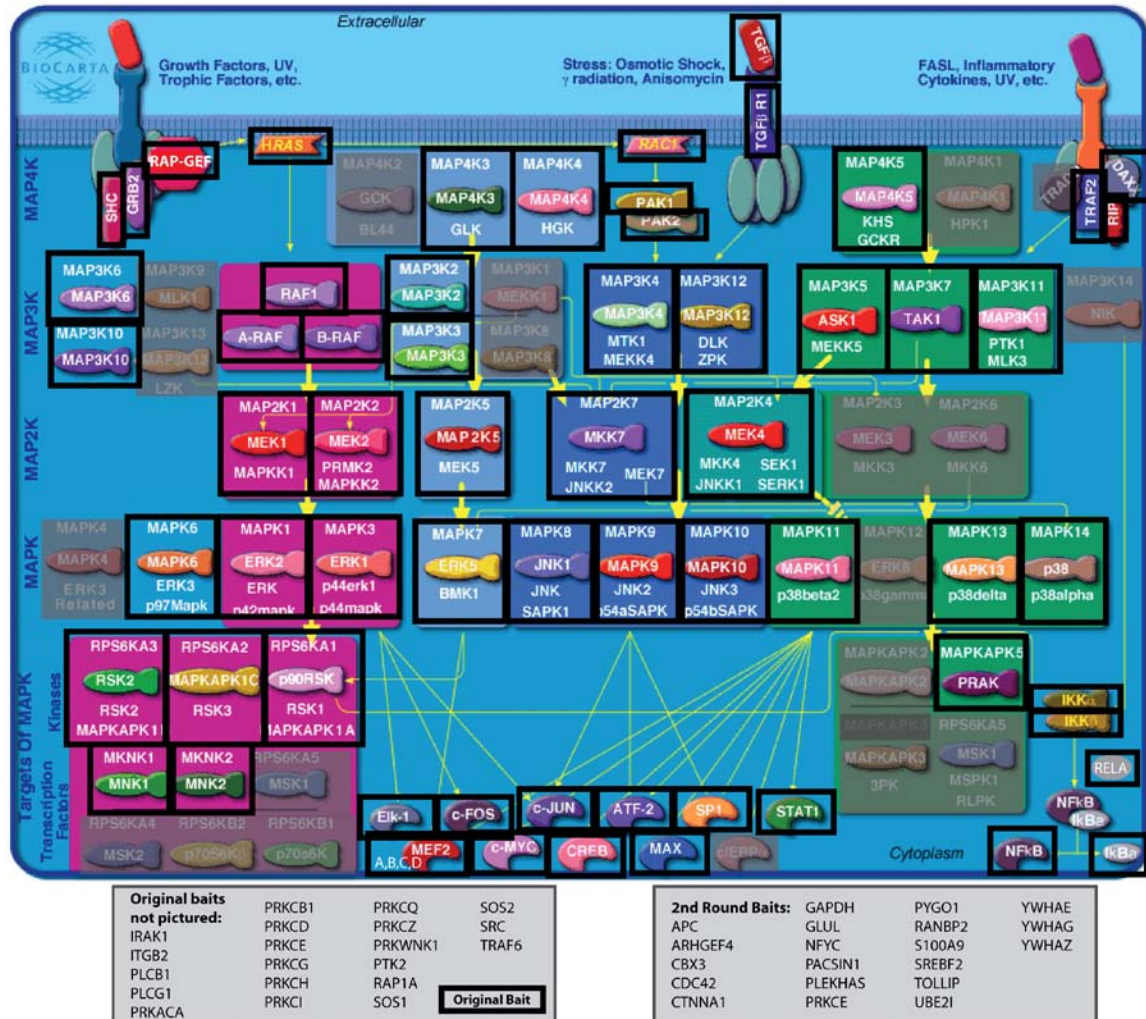

**Supplementary Figure 1: Signaling diagram of baits used in the MAPK Y2H network.** The 86 original baits and the 20 additional baits are shown. Image adapted from BioCarta “MAPKinase signaling pathway” ([http://www.biocarta.com/pathfiles/h\\_mapkPathway.asp](http://www.biocarta.com/pathfiles/h_mapkPathway.asp))

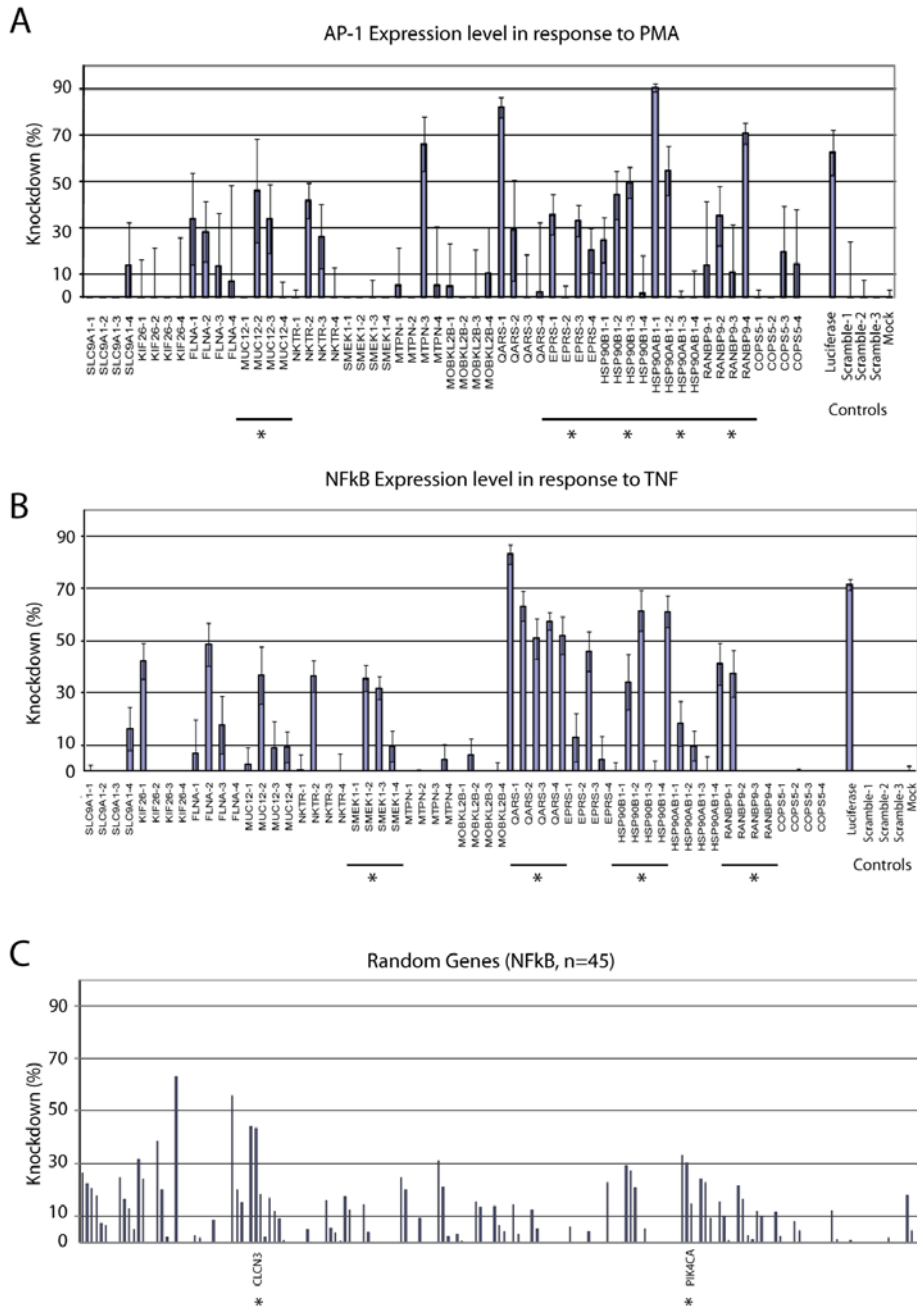

**Supplementary Figure 2. Functional validation of MAPK interactors using siRNA screening.** Four siRNAs against fourteen genes contained in the MAPK interactome were selected and tested for knockdown of luciferase-fused reporter constructs for AP-1 (**A**) and NFkB (**B**). Mock represents no siRNA control, Scramble indicates “scrambled” non-specific siRNA sequences, and Luciferase indicates siRNAs against the luciferase gene. Starred genes indicate those with two or more siRNAs which induce >30% knockdown. siRNAs that showed no knockdown phenotype are omitted for clarity. (**C**) Forty-five random genes are tested for functional interactions with NFkB. The two genes that show multiple siRNAs with greater than 30% knockdown are indicated.

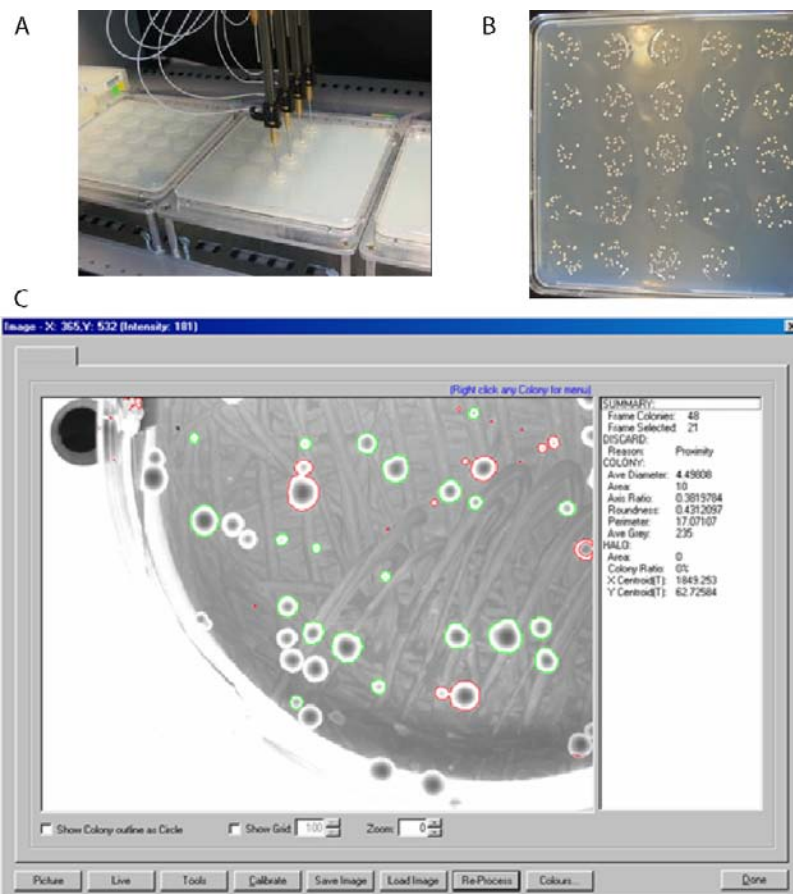

**Supplementary Figure 3. High-throughput Y2H screening process.** (A) Plating of mated Y2H clones. (B) View of plated colonies. (C) Image analysis of Y2H positive colonies for automated picking.

## Supplementary Tables

**Supplementary Table 3: List of candidate scaffolds identified in this study.**

| <b>GENE_ID</b> | <b>NAME</b> | <b>Percent of interactions with kinases</b> | <b>Total number of interactions</b> | <b>Interactions with number of different MAPK levels</b> |
|----------------|-------------|---------------------------------------------|-------------------------------------|----------------------------------------------------------|
| 10048          | RANBP9      | 42.9                                        | 14                                  | 2                                                        |
| 408            | ARRB1       | 42.9                                        | 7                                   | 2                                                        |
| 11064          | CEP1        | 50                                          | 4                                   | 2                                                        |
| 2316           | FLNA        | 50                                          | 14                                  | 2                                                        |
| 3181           | HNRPA2B1    | 50                                          | 6                                   | 2                                                        |
| 6154           | RPL26       | 50                                          | 6                                   | 2                                                        |
| 57459          | GATAD2B     | 60                                          | 5                                   | 2                                                        |
| 1387           | CREBBP      | 66.6                                        | 6                                   | 2                                                        |
| 6548           | SLC9A1      | 88.9                                        | 9                                   | 4                                                        |
| 26153          | KIF26A      | 100                                         | 4                                   | 3                                                        |

**Supplementary Table 6: List of cDNA sources used in this study**

|    | <b>Human Tissue</b>       |
|----|---------------------------|
| 1  | Adipose                   |
| 2  | Brain                     |
| 3  | Brain, caudate nucleus    |
| 4  | Brain, cerebellum         |
| 5  | Brain, hippocampus        |
| 6  | Colon                     |
| 7  | Colorectal adenocarcinoma |
| 8  | Fetal Brain               |
| 9  | Fetal lung                |
| 10 | Kidney                    |
| 11 | Leukocyte                 |
| 12 | Liver                     |
| 13 | Lung                      |
| 14 | Lung carcinoma            |
| 15 | Mammary Gland             |
| 16 | Melanoma                  |
| 17 | Pancreas                  |
| 18 | Placenta                  |
| 19 | Prostate Gland            |
| 20 | Spinal Cord               |
| 21 | Spleen                    |
| 22 | Testis                    |

**Supplementary Table 7: List of siRNA sequences used in this study.**

| Entrez Gene Id | NCBI gene symbol | mRNA Accessions               | siRNA Target Sequence     | Quiagen Product Id | Product Name  |
|----------------|------------------|-------------------------------|---------------------------|--------------------|---------------|
| 6548           | SLC9A1           | NM_003047                     | CAAGCTCAACCGGTTTAATAA     | SI00047446         | Hs_SLC9A1_2   |
| 6548           | SLC9A1           | NM_003047                     | CAGACCAATCTTAGTTTCTAA     | SI00047460         | Hs_SLC9A1_4   |
| 6548           | SLC9A1           | NM_003047                     | ACGAAGCGCTCCATCAACGAA     | SI03040877         | Hs_SLC9A1_5   |
| 6548           | SLC9A1           | NM_003047                     | CAGCATCATCTCGGCCGTGGA     | SI03065888         | Hs_SLC9A1_6   |
| 26153          | KIF26A           | XM_050278 XM_941210           | CTGAGGATCGTGCATAGCATA     | SI00462462         | Hs_KIF26A_3   |
| 26153          | KIF26A           | XM_050278 XM_941210           | GCCGTTTCGAGATCAAGGTGTA    | SI00462469         | Hs_KIF26A_4   |
| 26153          | KIF26A           | XM_050278 XM_941210           | not disclosed - validated | SI03019863         | Hs_KIF26A_5   |
| 26153          | KIF26A           | XM_050278 XM_941210           | not disclosed - validated | SI03019870         | Hs_KIF26A_6   |
| 2316           | FLNA             | NM_001456                     | CTCGGTTCGAGTACATCCCTTA    | SI00419748         | Hs_FLNA_1     |
| 2316           | FLNA             | NM_001456                     | CCGCTTACCATCGACACCAA      | SI00419755         | Hs_FLNA_2     |
| 2316           | FLNA             | NM_001456                     | CACCATGGAGTAGTGAACAA      | SI02655912         | Hs_FLNA_7     |
| 2316           | FLNA             | NM_001456                     | not disclosed - validated | SI02654722         | Hs_FLNA_5     |
| 10071          | MUC12            | XM_379904 XM_499351           | AAGGAACGAAGTCGCAAATGA     | SI00651511         | Hs_MUC12_1    |
| 10071          | MUC12            | XM_936315 XM_379904 XM_499351 | CGGCCTTGAGAACGCCTACAA     | SI00651518         | Hs_MUC12_2    |
| 10071          | MUC12            | XM_936315 XM_379904 XM_499351 | TAGCATCGTGGTCAAGAACGA     | SI00651525         | Hs_MUC12_3    |
| 10071          | MUC12            | XM_936315 XM_379904 XM_499351 | TTCGGAGATTGCTCAACGGTA     | SI00651532         | Hs_MUC12_4    |
| 4820           | NKTR             | NM_005385 NM_001012651        | CACAGTCTTATTCTAGAGGAA     | SI00076342         | Hs_NKTR_1     |
| 4820           | NKTR             | NM_005385 NM_001012651        | CACGCTTAAACCGTAGACCAA     | SI00076349         | Hs_NKTR_2     |
| 4820           | NKTR             | NM_005385 NM_001012651        | CAGGATTGGCAGTAAGAGATA     | SI00076356         | Hs_NKTR_3     |
| 4820           | NKTR             | NM_005385                     | CCAGATCAACCTCATTGATAA     | SI00076363         | Hs_NKTR_4     |
| 55671          | SMEK1            | NM_017936 NM_032560           | AAGAAAGATTATTGGATTAAA     | SI00462140         | Hs_KIAA2010_1 |
| 55671          | SMEK1            | NM_017936 NM_032560           | CAGATTTGTTTGACAACTAA      | SI00462147         | Hs_KIAA2010_2 |
| 55671          | SMEK1            | NM_017936 NM_032560           | CAGCCAGTCATCTACAACAAA     | SI00462161         | Hs_KIAA2010_4 |
| 55671          | SMEK1            | NM_017936 NM_032560           | CTCATACTGGTTGAATATAA      | SI03199560         | Hs_KIAA2010_5 |
| 136319         | MTPN             | NM_145808                     | CTCCACTGAAGTAATACTTAA     | SI00651315         | Hs_MTPN_1     |
| 136319         | MTPN             | NM_145808                     | CAGATTGTGGATAATAATTGA     | SI00651322         | Hs_MTPN_2     |
| 136319         | MTPN             | NM_145808                     | CTGGGATTCTGATCAAGTAA      | SI00651336         | Hs_MTPN_4     |
| 136319         | MTPN             | NM_145808                     | CTCCAGATAAACATCATATTA     | SI03200043         | Hs_MTPN_5     |
| 79817          | MOBKL2B          | NM_024761                     | CTGGTTATTGATGGAAGCAAAA    | SI00647031         | Hs_MOBKL2B_1  |
| 79817          | MOBKL2B          | NM_024761                     | AAGTATTTATGTGGTATTAAA     | SI00647045         | Hs_MOBKL2B_3  |
| 79817          | MOBKL2B          | NM_024761                     | AAGCATTTGACTATAAGGAAA     | SI00647052         | Hs_MOBKL2B_4  |
| 79817          | MOBKL2B          | NM_024761                     | CGGGAGCGTTGGCATGATTA      | SI03196914         | Hs_MOBKL2B_5  |
| 5859           | QARS             | NM_005051                     | CACGTGGTGGATGCAGCATTA     | SI00696703         | Hs_QARS_1     |
| 5859           | QARS             | NM_005051                     | CACCATGAATCTACTAAAGCA     | SI00696710         | Hs_QARS_2     |
| 5859           | QARS             | NM_005051                     | CCGGTCCCAGCAACCCAA        | SI00696724         | Hs_QARS_4     |
| 5859           | QARS             | NM_005051                     | TAGCCTATCGAGTCAAGTATA     | SI03111129         | Hs_QARS_5     |
| 2058           | EPRS             | NM_004446                     | CAGGAGGAGACTATACAATA      | SI00063833         | Hs_EPRS_1     |
| 2058           | EPRS             | NM_004446                     | AAGCATGAAGAGCTAATGCTA     | SI00063840         | Hs_EPRS_2     |
| 2058           | EPRS             | NM_004446                     | AAGGCGATTACTCAGTGTTAA     | SI00063847         | Hs_EPRS_3     |
| 2058           | EPRS             | NM_004446                     | AAGGAGGTGGCTCTCATCAA      | SI00063854         | Hs_EPRS_4     |
| 7184           | HSP90B1          | NM_003299                     | AGGACGGATGATGAAGTAGTA     | SI03044566         | Hs_HSP90B1_1  |
| 7184           | HSP90B1          | NM_003299                     | AAGTTGATGTGGATGGTACAG     | SI00302008         | Hs_TRA1_5     |
| 7184           | HSP90B1          | NM_003299                     | AAGTTGATGTGGATGGTACAT     | SI02655177         | Hs_TRA1_8     |
| 7184           | HSP90B1          | NM_003299                     | TCGCCTCAGTTTGAACATTGA     | SI02663738         | Hs_TRA1_9     |

|       |          |                                                                   |                           |            |               |
|-------|----------|-------------------------------------------------------------------|---------------------------|------------|---------------|
| 3326  | HSP90AB1 | NM_007355                                                         | CACAACGATGATGAACAGTAT     | SI03055304 | Hs_HSP90AB1_1 |
| 3326  | HSP90AB1 | NM_007355                                                         | CAGAAGACAAGGAGAATTACA     | SI03062990 | Hs_HSP90AB1_2 |
| 3326  | HSP90AB1 | NM_007355                                                         | TACGTTGCTCACTATTACGTA     | SI03110100 | Hs_HSP90AB1_3 |
| 3326  | HSP90AB1 | NM_007355                                                         | not disclosed - validated | SI02780561 | Hs_HSPCB_5    |
| 10048 | RANBP9   | NM_005493                                                         | ACGGTGTGGTTATGACCTTTA     | SI00078057 | Hs_RANBP9_2   |
| 10048 | RANBP9   | NM_005493                                                         | CAGTGCAATATTAGAAACCCA     | SI00078071 | Hs_RANBP9_4   |
| 10048 | RANBP9   | NM_005493                                                         | not disclosed - validated | SI02662289 | Hs_RANBP9_6   |
| 10048 | RANBP9   | NM_005493                                                         | CAGGTTGGGATAAGCATTTCAT    | SI02662842 | Hs_RANBP9_7   |
| 10987 | COPS5    | NM_006837                                                         | TAGGACATACCCAAAGGGCTA     | SI00092274 | Hs_COPS5_3    |
| 10987 | COPS5    | NM_006837                                                         | AAGAACAATATCCGCAGGGAA     | SI03030832 | Hs_COPS5_5    |
| 10987 | COPS5    | NM_006837                                                         | ATGCAATCGGGTGGTATCATA     | SI03049774 | Hs_COPS5_6    |
| 10987 | COPS5    | NM_006837                                                         | CTGGAATAAGGATCACCATTA     | SI03096905 | Hs_COPS5_7    |
| 1432  | MAPK14   | NM_001315 NM_139012<br>NM_139013 NM_139014<br>NM_001315 NM_139012 | AACTGCGGTTACTTAAACATA     | SI00300769 | Hs_MAPK14_5   |
| 1432  | MAPK14   | NM_139013 NM_139014<br>XM_001128827                               | CAGAGAACTGCGGTTACTTAA     | SI00605157 | Hs_MAPK14_6   |
| 4214  | MAP3K1   | XM_042066<br>XM_001128827                                         | not disclosed - validated | SI02659958 | Hs_MAP3K1_10  |
| 4214  | MAP3K1   | XM_042066                                                         | not disclosed - validated | SI02659965 | Hs_MAP3K1_11  |
| 5608  | MAP2K6   | NM_002758 NM_031988                                               | AAGGCTTGCAATTTCTATTGGA    | SI02222997 | Hs_MAP2K6_5   |
| 5608  | MAP2K6   | NM_031988                                                         | TAGACCTATGATAAATAACCA     | SI02223004 | Hs_MAP2K6_6   |

## **Supplementary Methods**

### **Y2H network generation**

Both bait and prey were cloned as double fusions in plasmids pOBD.111 and pOAD.102. The Y2H procedure is as described in LaCount et al. (1). The cDNA was cloned between the 2-hybrid domain on the 5' end of the insert and an in-frame selection marker on the 3' end of the insert. Bait cDNA was cloned between the GAL4 binding domain and the TRP1 coding region. Preys were cloned between the GAL4 transcriptional activation domain and URA3. Both bait and prey cDNA libraries were prepared by random primed cDNA synthesis from polyA-selected RNA isolated from the human tissues (outlined Supplementary Table 6) followed by the PCR addition of yeast recombination tails. These cDNAs were then cloned into linearized expression vectors by recombination in yeast. Transformed bait yeast were plated on medium lacking tryptophan to select for in-frame TRP1 fusions, and prey were selected without uracil for in-frame URA3 fusions. Y2H screens were performed in 96-well plates by mating in each well  $5 \times 10^6$  cells of a yeast clone expressing a single bait with  $5 \times 10^6$  clonally diverse cells from a prey library. After mating overnight, the well contents were plated on medium that selected simultaneously for successful mating, expression of the ORF-selection markers, and activity of the metabolic reporter genes ADE2 and HIS3 (Supplementary Figure 3A,B). Two-hybrid-positive diploids were counted and up to 48 colonies per mating were picked and transferred to liquid medium (Supplementary Figure 3C). Searches that yielded more than 200 positives were considered to be self activators (i.e. resulting from bait plasmids that activated transcription in the absence of specific protein-protein interactions) and were not analyzed further. The liquid cultures were then used as template for separate PCR reactions to amplify insert sequence from bait and prey plasmids for subsequent sequence determination. This sequence information was processed to perform vector and adaptor clipping, read assembly, repeat masking and contamination filtering. Subsequently, sequences were BLASTed against RefSeq and the top hit used for identification and Entrez Gene mapping.

### **Incorporation of other networks and identification of network modules**

Literature-curated human protein interactions were obtained from BIND (4) and HPRD (5) and interactions in the BioCarta Database (6) (Supplementary Table 2). To identify conserved human interactions, yeast literature curated protein-protein interactions were taken from Reguly et al. (8) and combined with Ptacek et al. (9), Gavin et al. (10), Ito et al. (11), Ho et al. (12) and Uetz et al. (13).



## **Supplementary References**

1. D. J. LaCount *et al.*, *Nature* **438**, 103 (Nov 3, 2005).
2. S. K. Chanda *et al.*, *Proc. Natl. Acad. Sci. U S A* **100**, 12153 (Oct 14, 2003).
3. R. Konig *et al.*, *Nat. Methods* **4**, 847 (Oct, 2007).
4. G. D. Bader *et al.*, *Nucleic Acids Res* **29**, 242 (Jan 1, 2001).
5. S. Peri *et al.*, *Genome Res.* **13**, 2363 (Oct, 2003).
6. BioCarta, *p38 MAPK Signaling Pathway*  
([http://www.biocarta.com/pathfiles/m\\_p38mapkPathway.asp](http://www.biocarta.com/pathfiles/m_p38mapkPathway.asp)), pp.
7. B. Chen, W. H. Piel, L. Gui, E. Bruford, A. Monteiro, *Genomics* **86**, 627 (Dec, 2005).
8. T. Reguly *et al.*, *J. Biol.* **5**, 11 (2006).
9. J. Ptacek *et al.*, *Nature* **438**, 679 (Dec 1, 2005).
10. A. C. Gavin *et al.*, *Nature* **415**, 141 (Jan 10, 2002).
11. T. Ito *et al.*, *Proc. Natl. Acad. Sci. U S A* **98**, 4569 (Apr 10, 2001).
12. Y. Ho *et al.*, *Nature* **415**, 180 (Jan 10, 2002).
13. P. Uetz *et al.*, *Nature* **403**, 623 (Feb 10, 2000).
14. I. Lee, S. V. Date, A. T. Adai, E. M. Marcotte, *Science* **306**, 1555 (Nov 26, 2004).
15. C. von Mering *et al.*, *Nature* **417**, 399 (May 23, 2002).
